# Supplementary material for: Microwave absorption enhancement by adjusting reactant ratios and filler contents based on 1D K–MnO2@PDA and poly(vinylidene fluoride) matrix
Source: Royal Society of Chemistry journal article supplement (doi:10.1039/c9ra01248f), 2019-01-01
Supplement: c9ra01248f1.pdf [file c9ra01248f1.pdf]

## Supporting Information

### **Microwave absorption enhancement by adjusting reactant amounts ratios and filler contents based on 1D K-MnO<sub>2</sub>@PDA and poly(vinylidene fluoride) matrix**

Shu-Qing Lv,<sup>a</sup> Wei Xu,<sup>b,c</sup> Wujisiguleng Huang,<sup>a</sup> Guo-Cheng Lv,<sup>\*b</sup> Guang-Sheng Wang<sup>\*c</sup>

<sup>a</sup> School of Civil Engineering, Northeast Dianli University, Jilin 132012, PR China

<sup>b</sup> School of Materials Science and Technology, China University of Geosciences, Beijing, 100083, PR China. E-mail: guochenglv@cugb.edu.cn

<sup>c</sup> School of Chemistry, Beihang University, Beijing 100191, PR China. E-mail: wanggsh@buaa.edu.cn

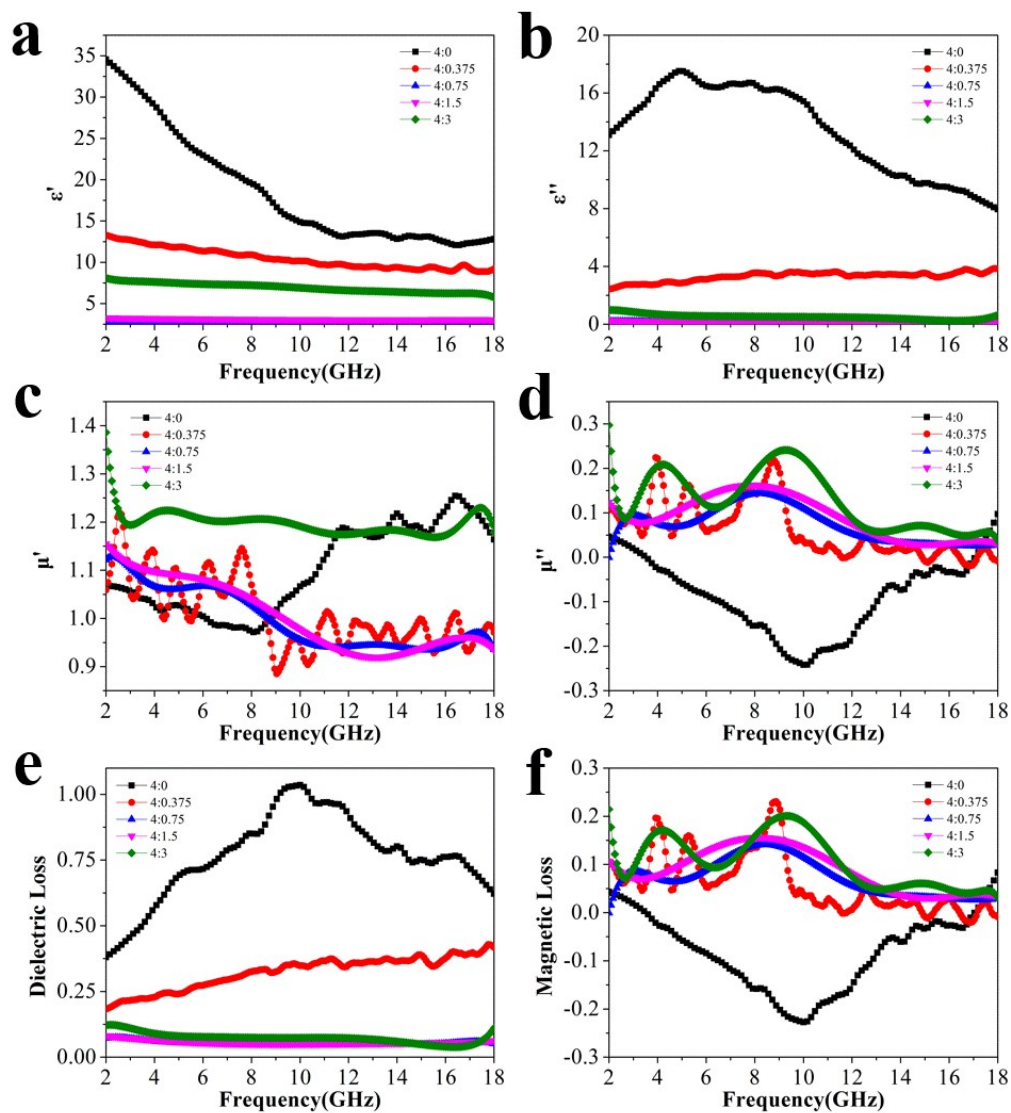

**Figure S1.** (a) Real and (b) imaginary parts of relative complex permittivity; (c) real and (d) imaginary parts of relative complex permeability; (e) dielectric loss and (f) magnetic loss for various reactants amounts ratios composites in the frequency range of 2–18 GHz.

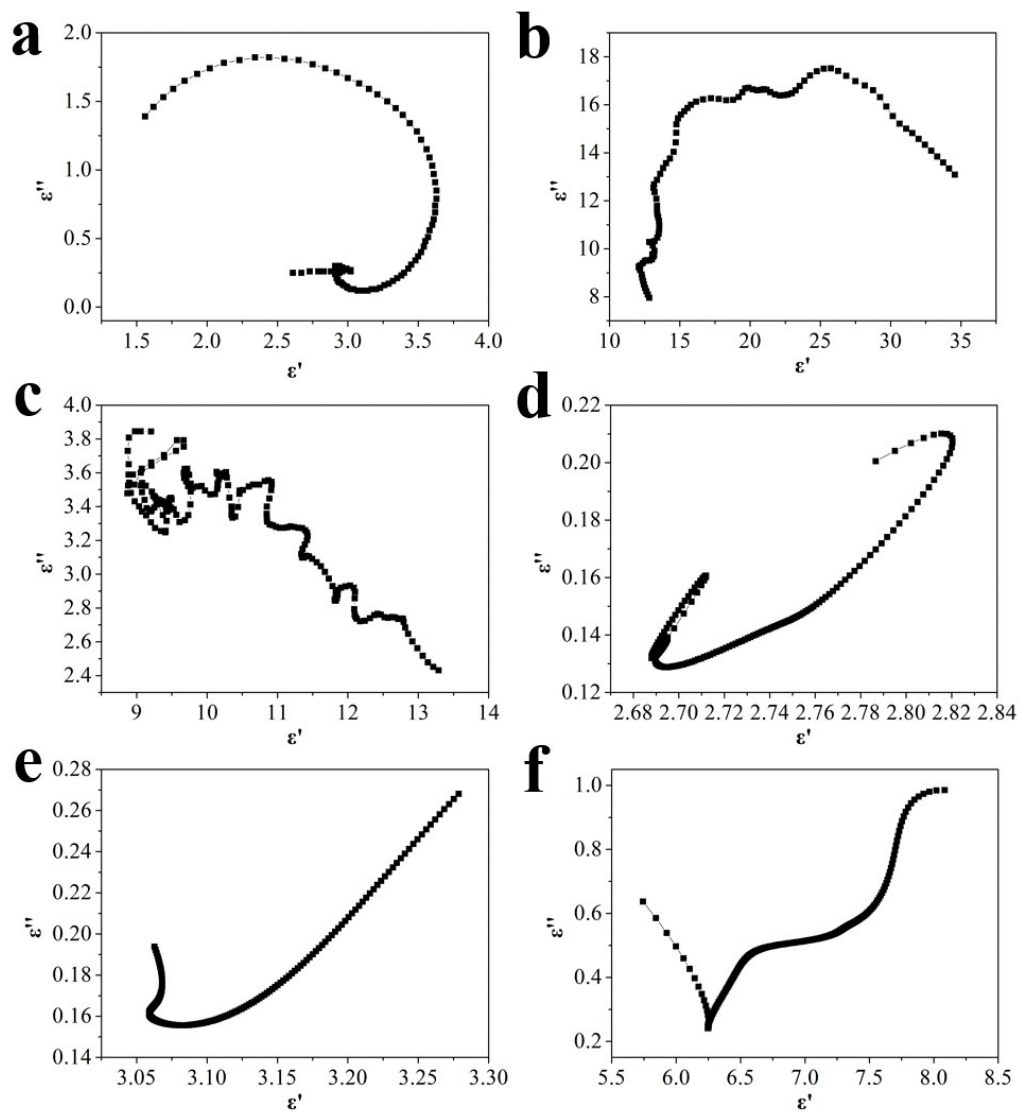

**Figure S2.** The corresponding plots of  $\epsilon'$  versus  $\epsilon''$  for (a) pure PVDF, (b) 4:0, (c) 4:0.375, (d) 4:0.75, (e) 4:1.5, (f) 4:3 reactants amounts ratio composites with 20 wt% filler content.

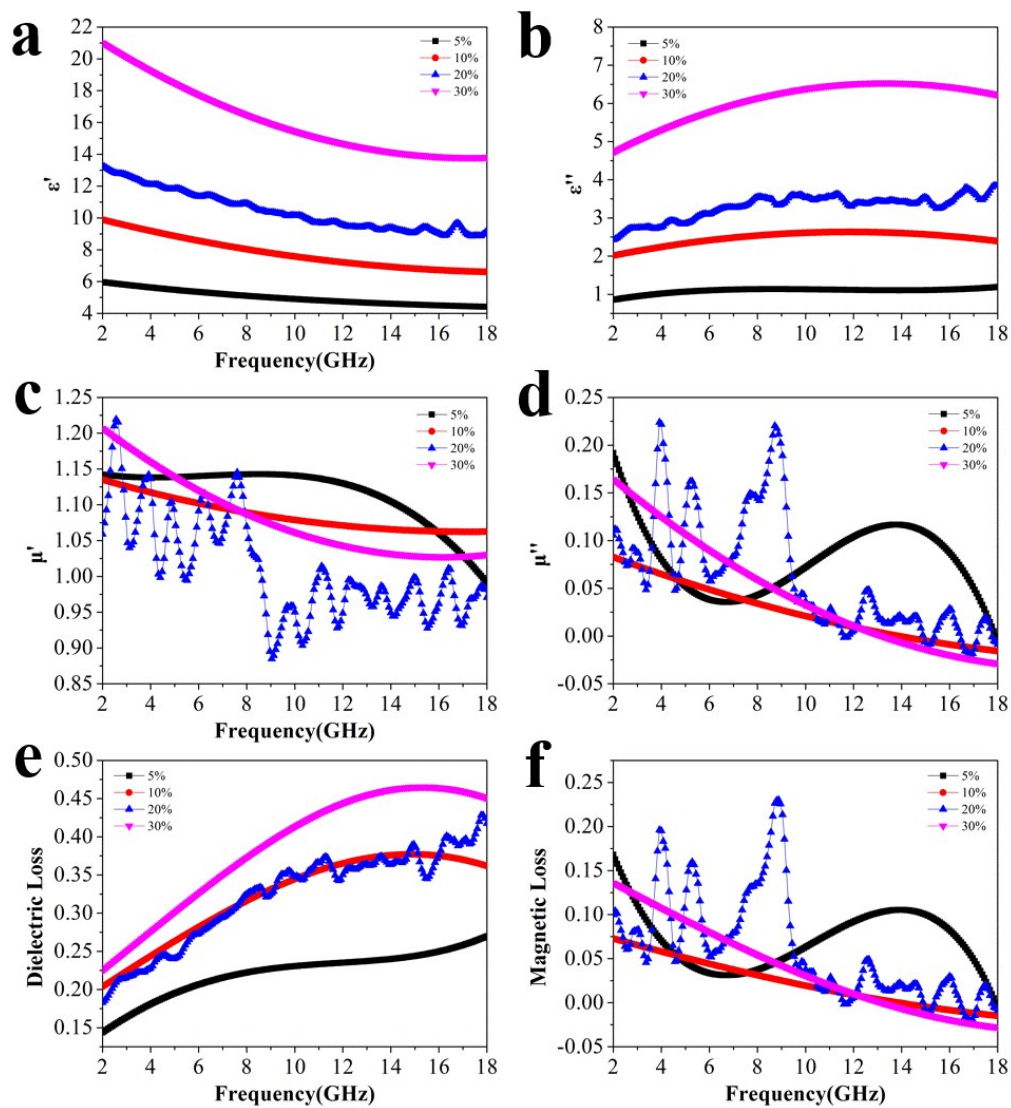

**Figure S3.** (a) Real and (b) imaginary parts of relative complex permittivity; (c) real and (d) imaginary parts of relative complex permeability; (e) dielectric loss and (f) magnetic loss for various filler contents composites in the frequency range of 2–18 GHz.

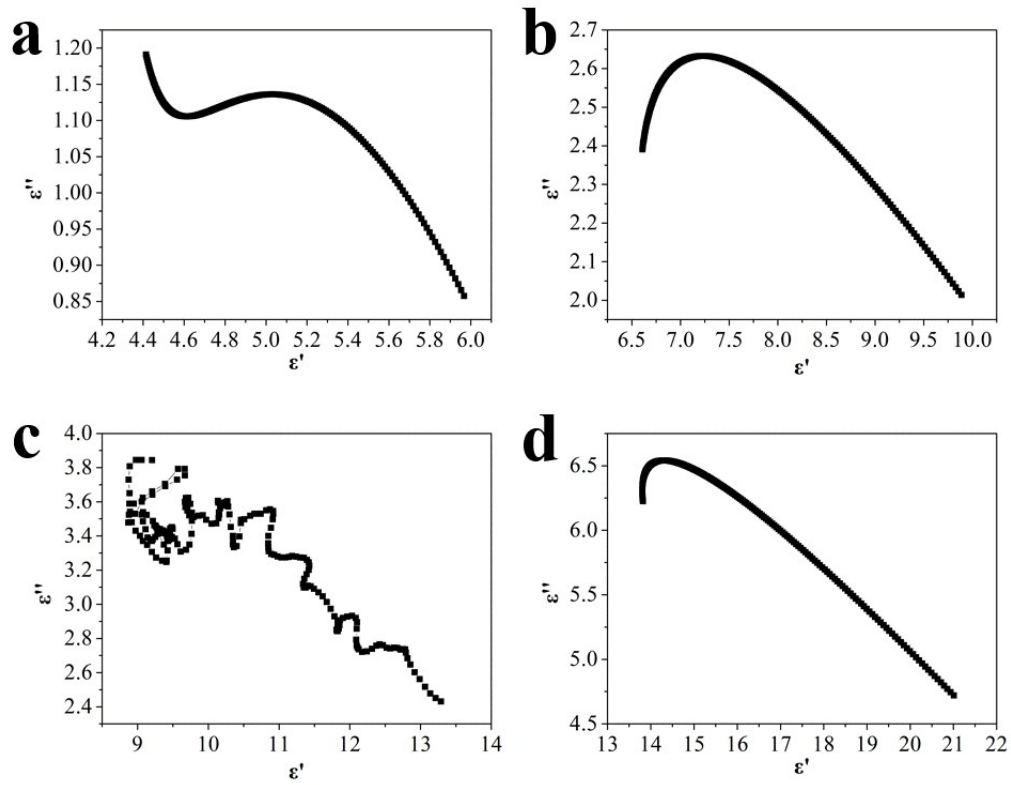

**Figure S4.** The corresponding plots of  $\epsilon'$  versus  $\epsilon''$  for composites with filler contents of (a) 5%, (b) 10%, (c) 20%, (d) 30%.
